# Supplementary material for: Cortical Excitability across the ALS Clinical Motor Phenotypes
Source: Brain Sci. 2021 May 28;11(6):715. doi: 10.3390/brainsci11060715 (PMC8230203; doi:10.3390/brainsci11060715)
Supplement: Supplementary file 1 [file brainsci-11-00715-s001.zip › brainsci-1215959-supplementary.pdf]

**Supplementary Table 1 Clinical motor phenotypes**

| Clinical motor phenotype                   | Clinical features |      | Clinical site of onset<br>(~% frequency)            | Number of all cases (~%) | Age at onset<br>(mean, years) | M:F              | Prognosis<br>Median in yrs<br>( 10-yr survival rate, %)                        |
|--------------------------------------------|-------------------|------|-----------------------------------------------------|--------------------------|-------------------------------|------------------|--------------------------------------------------------------------------------|
|                                            | UMN               | LMN  |                                                     |                          |                               |                  |                                                                                |
| 'Typical' phenotype:                       |                   |      |                                                     |                          |                               |                  |                                                                                |
| Classical ALS                              | +                 | +    | UL (34)<br>LL (33)                                  | 70-75                    | 56.3-62.8<br>(mean range)     | 1.65:1<br>1:0.71 | 2.8 (6.3)                                                                      |
|                                            |                   |      | Bulbar (20)                                         |                          | 61.4                          | 0.98:1           | 2.0 (2.1-3.4)                                                                  |
|                                            |                   |      | Respiratory (1-5)<br>Axial, head drop (rare)        |                          | (as above)                    | 6.00:1<br>--     | 1.4^ (0)<br>--                                                                 |
| 'Atypical' phenotypes:                     |                   |      |                                                     |                          |                               |                  |                                                                                |
| Primary lateral sclerosis (PLS)            | +++               | +/-* | LL (81)<br>Bulbar (13)<br>UL (6)                    | 2-5                      | 45-52<br>(mean range)         | 0.98:1           | 13.1 (71.1)                                                                    |
| Progressive muscular atrophy (PMA)         | +/-**             | +++  | UL (47)<br>LL (30)<br>Shoulder girdle (23)          | 5                        | 61.1                          | 2.04:1           | 3.3 (11.5)<br>[Similar to classical forms when<br>generalised (>50% regions) ] |
| Restricted variants                        |                   |      |                                                     |                          |                               |                  |                                                                                |
| - Flail arm variant<br>- Flail leg variant | +/-               | +++  | UL (100)<br>LL (100)<br>[Restricted for ≥12 months] | 5-6<br>3-3.5             | 57.3<br>55.0                  | 4.00:1<br>1.03:1 | 5.0 (15.8)<br>3.0-5.7 (5.3-12.8)                                               |
| Isolated bulbar palsy (IBP)                | ++                | +    | Bulbar (100)<br>[Restricted for ≥6 months]          | 1-4                      | 65-68<br>(mean range)         | 1:3.00           | 3.4                                                                            |

**Supplementary Table 1:** Frequency, demographics and survival of the typical and atypical phenotypes. +++, primary feature; +/-, possible but not typical; + or ++, typical to the indicated degree. \* No 'active' LMN degeneration, but minor denervation may be present on EMG ; \*\* clinical UMN signs can develop within 18months for PMA. UMN, upper motor neurone; LMN, lower motor neurone; UL, upper limb; LL, lower limb; M, male; F, female. N.B: Reported frequencies differ slightly across populations [1-4].^ mean survival given here.
